# Supplementary material for: Enhanced Vasculogenic Capacity Induced by 5-Fluorouracil Chemoresistance in a Gastric Cancer Cell Line
Source: MDPI journal article supplement (doi:10.3390/ijms22147698), 2021-07-19
Supplement: s1 [file s1]

| node1  | node2  | node1 accession | node2 accession | coexpression score |
|--------|--------|-----------------|-----------------|--------------------|
| EPHA2  | LGALS3 | ENSP00000351209 | ENSP00000254301 | 0.065              |
| KDR    | PECAM1 | ENSP00000263923 | ENSP00000457421 | 0.062              |
| KDR    | TYMP   | ENSP00000263923 | ENSP00000379038 | 0.049              |
| LGALS3 | EPHA2  | ENSP00000254301 | ENSP00000351209 | 0.065              |
| PECAM1 | KDR    | ENSP00000457421 | ENSP00000263923 | 0.062              |
| PECAM1 | TYMP   | ENSP00000457421 | ENSP00000379038 | 0.091              |
| TYMP   | KDR    | ENSP00000379038 | ENSP00000263923 | 0.049              |
| TYMP   | PECAM1 | ENSP00000379038 | ENSP00000457421 | 0.091              |
